# Supplementary material
Source: publisher figshare collection journal article supplement (https://acs.figshare.com/ndownloader/files/28954765)
Supplement: Supplementary file 1 [file 28954765]

Supporting Information:

A tight-binding approach to  
pyrazine-mediated superexchange in  
copper-pyrazine antiferromagnets

E. P. Kenny,\* A. C. Jacko, and B. J. Powell

*School of Mathematics and Physics, The University of Queensland, St Lucia, Queensland,  
Australia, 4072*

E-mail: elisekenny@gmail.com

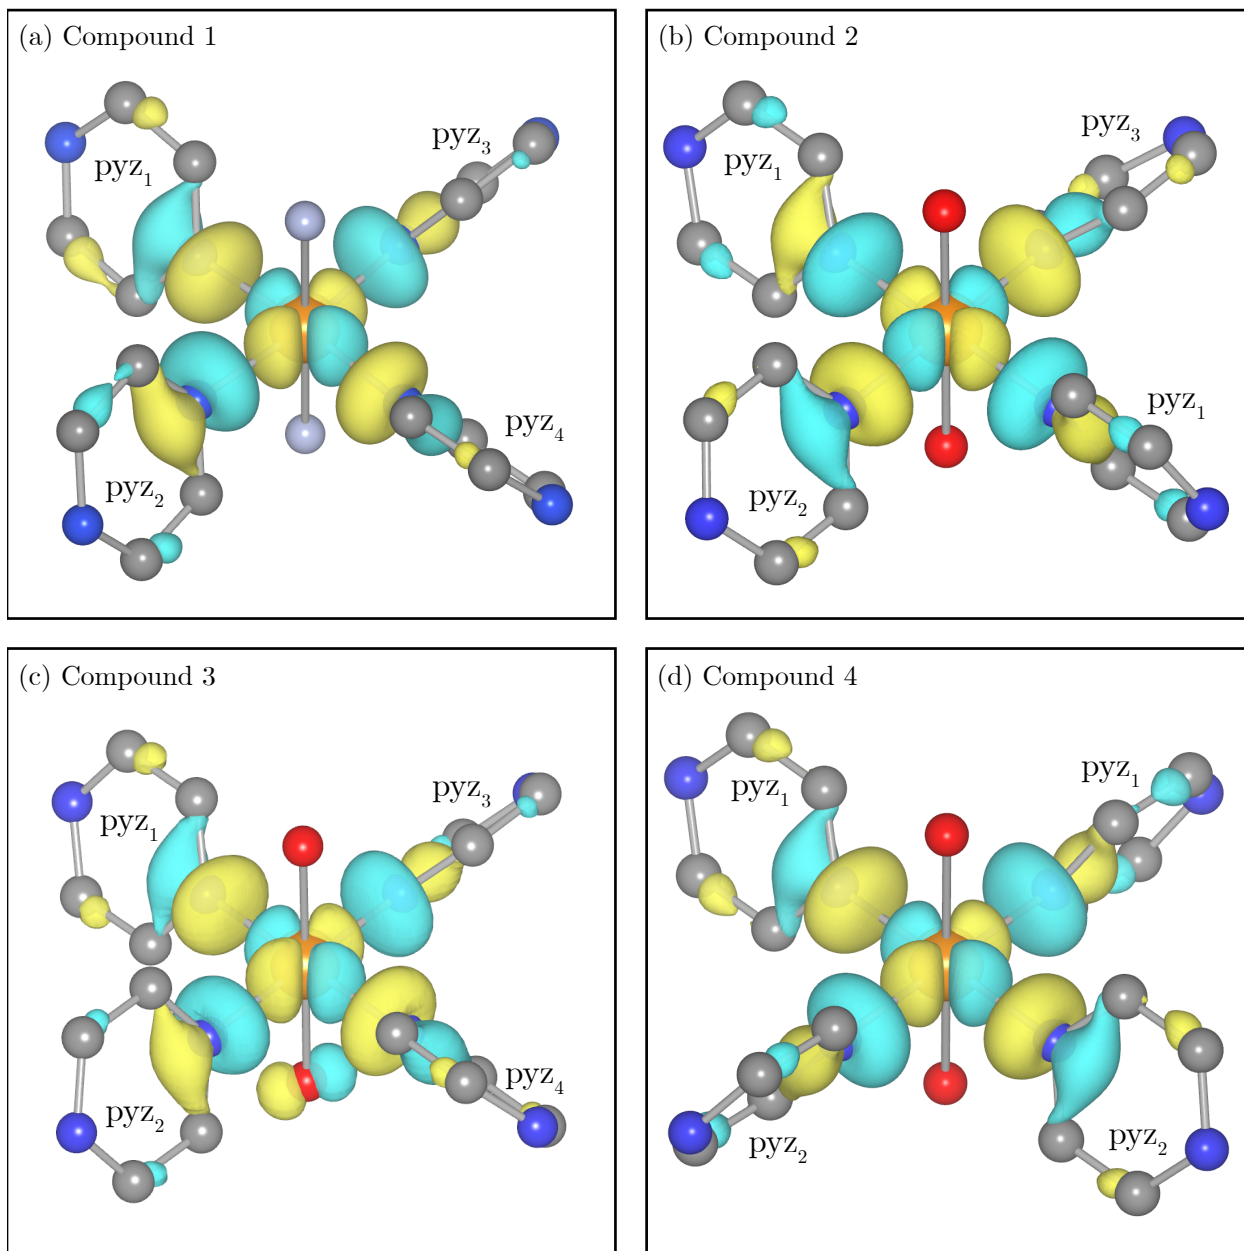

Figure S1: Cu-centered Wannier functions for the two-Wannier model (one on each Cu in the unit cell) for (a) **1**, (b) **2**, (c) **3**, and (d) **4**. All resemble hybrid orbitals of Cu  $d_{x^2-y^2}$  and N  $sp^2$ . In **3**, there is some weight on one of the inter-layer ligands, 4-phpy-O.

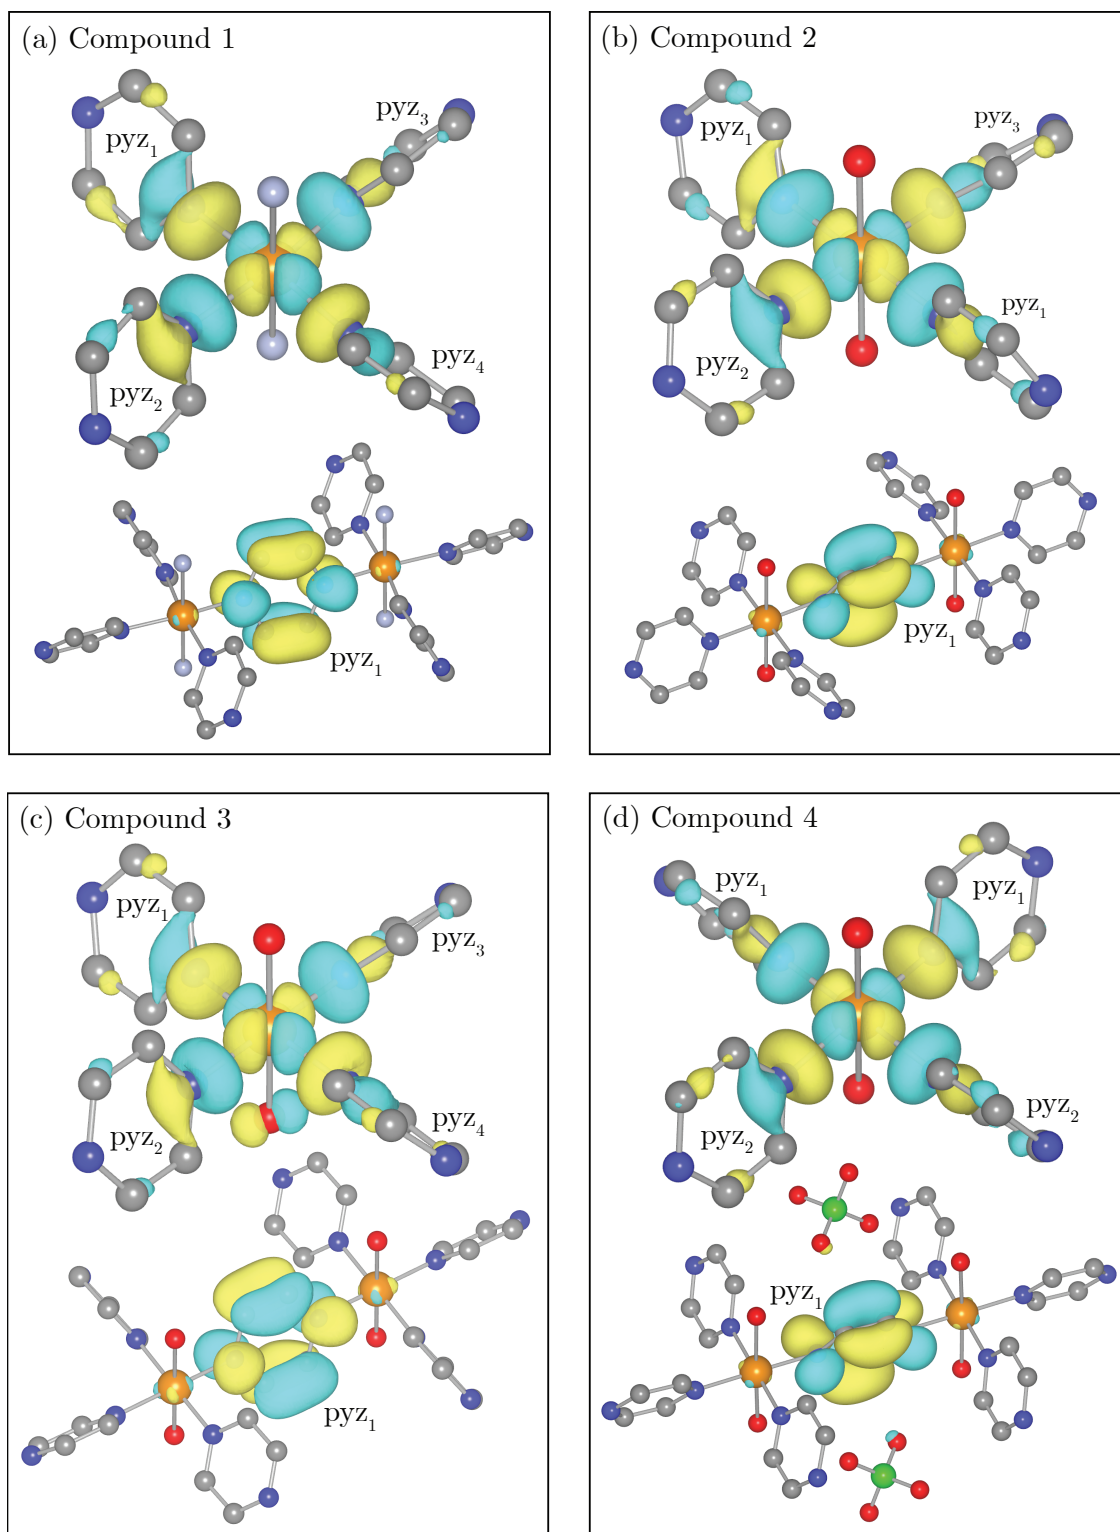

Figure S2: Cu-centered and pyz-centered Wannier functions for the six-Wannier model (one on each Cu and pyz in the unit cell) for (a) **1**, (b) **2**, (c) **3**, and (d) **4**. All Cu-centered functions are very similar to their counterparts in the two-Wannier model (in Figure S1). The pyz-centered Wanniers all resemble the lowest, unoccupied molecular orbital of an isolated pyz. The other pyz-centered functions (not shown here) are all similar to the ones shown.
